# Supplementary material for: Identification of a recessive gene YrZ15-1370 conferring adult plant resistance to stripe rust in wheat-Triticum boeoticum introgression line
Source: Research Square preprint supplement (doi:10.21203/rs.3.rs-278043/v1), 2021-03-05
Supplement: Supplementary file 1 [file 6c38760b093da012c0ab42cf.xlsx]

## Sheet: Sheet1
Table S2 –Gene annotation of the YrZ15-1370 genomic region in chromosome 6AL of T. urartu.
Gene	Product	Nucleotide start	End
TuG1812G0600004096.01	SWEET sugar transporter	557345827	557347938
TuG1812G0600004097.01	SWEET sugar transporter	557656470	557658349
TuG1812G0600004098.01	SWEET sugar transporter	557712447	557714459
TuG1812G0600004099.01	U box domain	557728173	557729579
TuG1812G0600004100.01	unknown function	557757050	557758208
TuG1812G0600004101.01	Germin	557798405	557799430
TuG1812G0600004102.01	Germin	557826479	557827521
TuG1812G0600004103.01	F-box domain	557831684	557840490
TuG1812G0600004104.01	Phloem protein 2-like	557849686	557850174
TuG1812G0600004 105.01	Phloem protein 2-like	557853557	557854521
TuG1812G0600004 106.01	Pyridine nucleotide-disulphide oxidoreductase	557862681	557863172
TuG1812G0600004 107.01	F-box domain	558063691	558065535
TuG1812G0600004 108.01	Domain of unknown function DUF4220	558104075	558112727
TuG1812G0600004 109.01	Zinc finger	558182230	558186662
TuG1812G0600004 110.01	Zinc finger	558252002	558256434
TuG1812G0600004 111.01	Phloem protein 2-like	558265018	558266010
TuG1812G0600004 112.01	Fatty acid hydroxylase	558280201	558283892
TuG1812G0600004 113.01	unknown function	558306962	558308097
TuG1812G0600004 114.01	Rice_gene=LOC_Os10g22869.1	558339918	558343082
TuG1812G0600004 115.01	Protein kinase domain	558340230	558342879
TuG1812G0600004 116.01	Protein kinase domain	558345222	558351017
TuG1812G0600004 117.01	Protein kinase domain	558358798	558362070
TuG1812G0600004 118.01	Cytochrome c1	558368115	558369103
TuG1812G0600004 120.01	unknown function	558374020	558374455
TuG1812G0600004 119.01	Cytochrome c-like domain	558374153	558375265
TuG1812G0600004 121.01	unknown function	558375219	558383295
TuG1812G0600004 122.01	Ribosomal protein L14b/L23e	558383493	558385877
TuG1812G0600004 123.01	unknown function	558389099	558389320
TuG1812G0600004 124.01	unknown function	558646351	558648729
TuG1812G0600004 125.01	Transposase	558761219	558782316
TuG1812G0600004 126.01	Protein of unknown function DUF594	559094074	559096104
TuG1812G0600004 127.01	Rice_gene=LOC_Os07g39500.1	559099984	559107687
TuG1812G0600004 128.01	unknown function	559180415	559182234
TuG1812G0000202900.01	Rice_gene=LOC_Os02g57010.	559409405	559411095
TuG1812G0600004 129.01	RNA recognition motif domain	559409405	559411095
TuG1812G00003420000.01	Rice_gene=LOC_Os02g57010.1	559409405	559411095
TuG1812G0600004 130.01	Alcohol dehydrogenase superfamily	559421534	559425188
TuG1812G0000203400.01	Rice_gene=LOC_Os02g57000.1	559449113	559451699
TuG1812G0600004 131.01	Ribonuclease H-like domain	559455436	559455727
TuG1812G0600004 132.01	Homeodomain-like	559528189	559532334
TuG1812G0600004 133.01	Serine-threonine/tyrosine-protein kinase catalytic domain	559542770	559550369
TuG1812G0600004 134.01	Peptidase C48	559684322	559686278
TuG1812G0600004 135.01	FAR1 DNA binding domain	559688937	559694396
TuG1812G0600004 136.01	unknown function	559700847	559702422
TuG1812G0600004 137.01	PPPDE putative peptidase domain	559716574	559718007
TuG1812G0600004 138.01	WD40 repeat	559865770	559875105
TuG1812G0600004 139.01	WD40 repeat	559875611	559880780
TuG1812G0600004 140.01	Rice_gene=LOC_Os02g56870.1	559936190	559936788
TuG1812G0600004 141.01	PGG domain	559938682	559938940
TuG1812G0600004 142.01	unknown function	559952894	559956087
TuG1812G0600004 143.01	FAE1/Type III polyketide synthase-like Protein	560038873	560039924
TuG1812G0600004 144.01	Pyridine nucleotide-disulphide oxidoreductase	560087999	560093523
TuG1812G0600004 145.01	F-box domain	560097457	560099864
TuG1812G0600004 146.01	F-box domain	560102591	560104896
TuG1812G0600004 147.01	F-box domain	560113300	560115205
TuG1812G0600004 148.01	F-box domain	560113378	560115205
TuG1812G0600004 149.01	Ribosomal protein L37e	560191447	560193096
TuG1812G0000202700.01	Rice_gene=LOC_Os02g57000.1	560231601	560232557
TuG1812G0600004 150.01	Rice_gene=LOC_Os02g57000.1	560231601	560232557
